# Supplementary material for: Next Generation Mapping of Enological Traits in an F2 Interspecific Grapevine Hybrid Family
Source: PubMed Central journal article supplement (PMC4790954; doi:10.1371/journal.pone.0149560), 2016-03-14

Chr 1

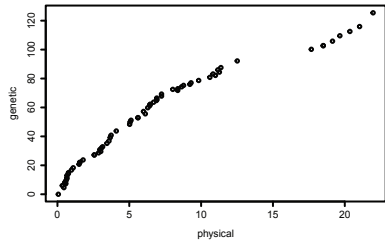

Chr 2

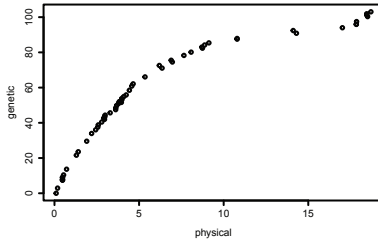

Chr 3

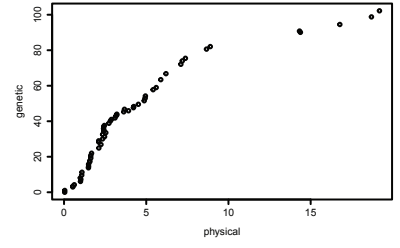

Chr 4

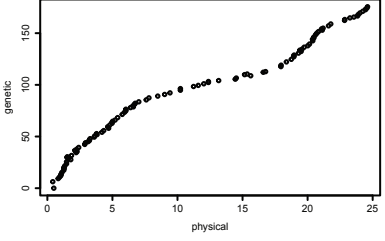

Chr 5

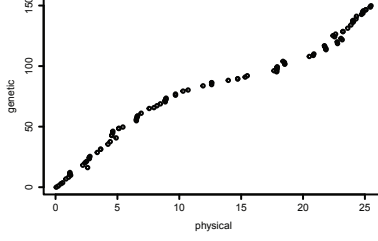

Chr 6

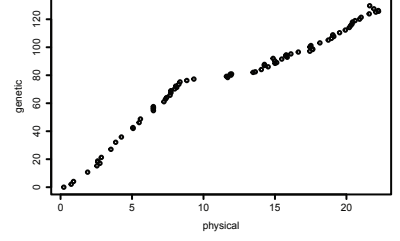

Chr 7

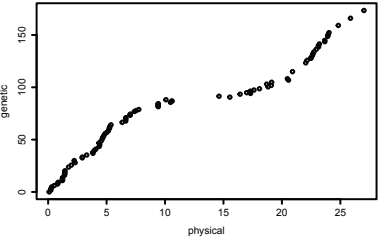

Chr 8

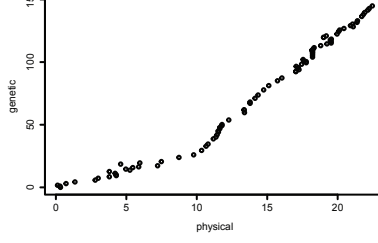

Chr 9

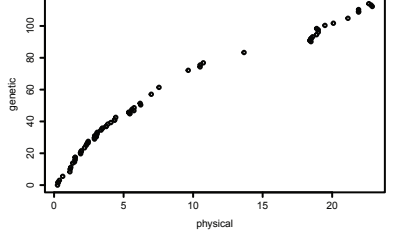

Chr 10

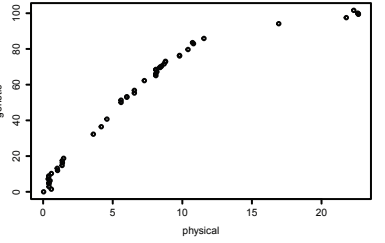

Chr 11

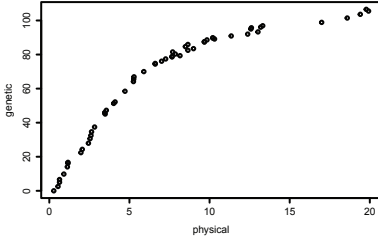

Chr 12

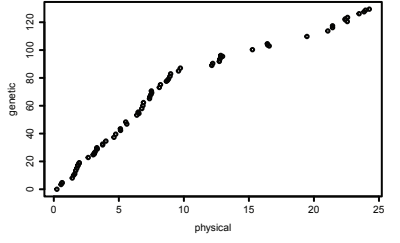

Chr 13

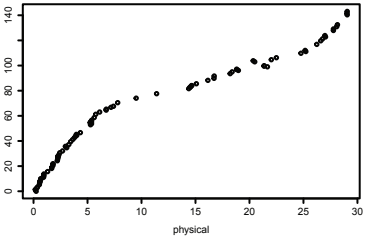

Chr 14

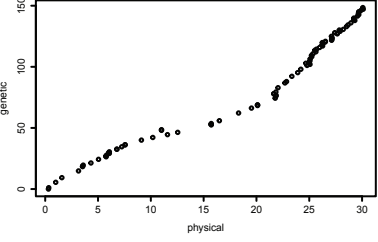

Chr 15

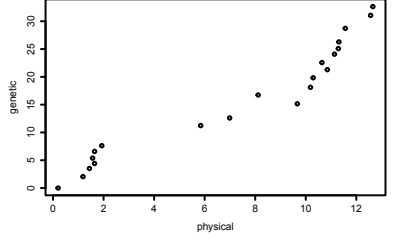

Chr 16

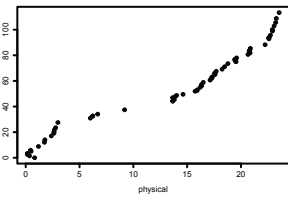

Chr 17

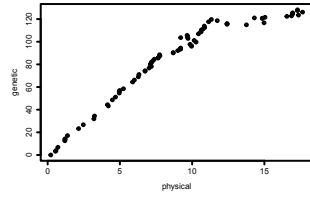

Chr 18

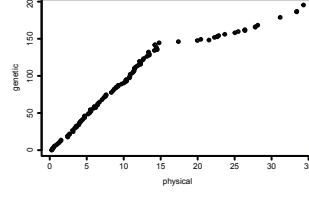

Chr 19

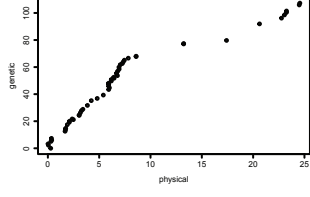

Supplement: pone.0149560.s003.pdf [file pone.0149560.s003.pdf]
