# Supplementary material for: Next Generation Mapping of Enological Traits in an F2 Interspecific Grapevine Hybrid Family
Source: PubMed Central journal article supplement (PMC4790954; doi:10.1371/journal.pone.0149560), 2016-03-14

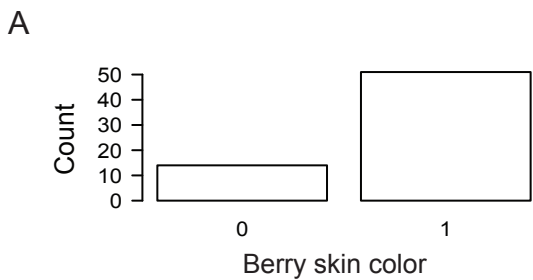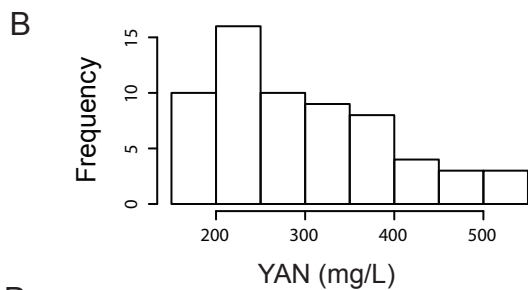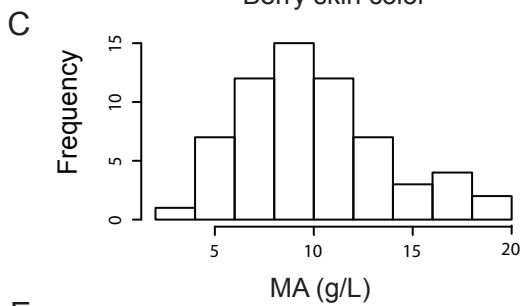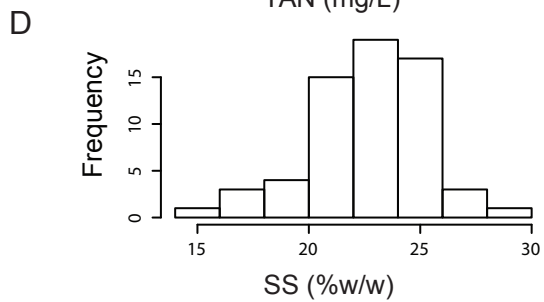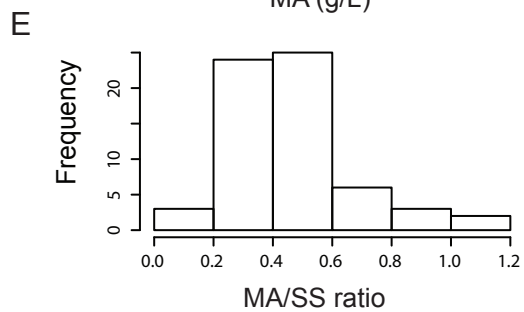

Supplement: pone.0149560.s004.pdf [file pone.0149560.s004.pdf]
