# Supplementary material for: Next Generation Mapping of Enological Traits in an F2 Interspecific Grapevine Hybrid Family
Source: PubMed Central journal article supplement (PMC4790954; doi:10.1371/journal.pone.0149560), 2016-03-14

**A****SS**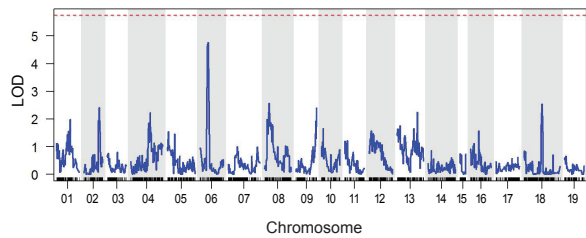**B****MA/SS ratio**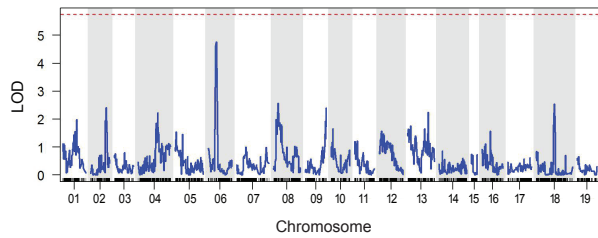

Supplement: pone.0149560.s006.pdf [file pone.0149560.s006.pdf]
